# Supplementary material for: Generation and hetero-Diels–Alder reactions of an o-quinone methide under mild, anionic conditions: rapid synthesis of mono-benzannelated spiroketals
Source: Royal Society of Chemistry journal article supplement (doi:10.1039/b806593d), 2008-01-01

*Supplementary Information for*

**Generation and *Hetero*-Diels-Alder Reactions of an *o*-Quinone  
Methide under Mild, Anionic Conditions: Rapid Synthesis of  
*mono*-Benzannelated Spiroketal**

Christopher D. Bray

*School of Biological and Chemical Sciences, The Walter Besant Building, Queen Mary,  
University of London, Mile End Road, London E1 4NS, U.K.*

*Fax: +44 (0)20 7882 7427; Tel: +44 (0)20 7882 3271*

E-mail: c.bray@qmul.ac.uk

**<sup>1</sup>H and <sup>13</sup>C NMR Spectra**

|                                                                                              |   |
|----------------------------------------------------------------------------------------------|---|
| 2,3,3a,9a-Tetrahydro-4 <i>H</i> -1,9-dioxo-cyclopenta[ <i>b</i> ]naphthalene <b>8a</b> ..... | 2 |
| 3,4,4a,10a-Tetrahydro-2 <i>H</i> ,5 <i>H</i> -pyrano[2,3- <i>b</i> ]chromene <b>8b</b> ..... | 3 |
| 2-Ethoxychroman <b>8c</b> .....                                                              | 4 |
| 2-Butoxychroman <b>8d</b> .....                                                              | 5 |
| 2-Ethylsulfanylchroman <b>8e</b> .....                                                       | 6 |
| <i>mono</i> -Benzannelated [5,6]-spiroketal <b>8f</b> .....                                  | 7 |
| <i>mono</i> -Benzannelated [6,6]-spiroketal <b>8g</b> .....                                  | 8 |

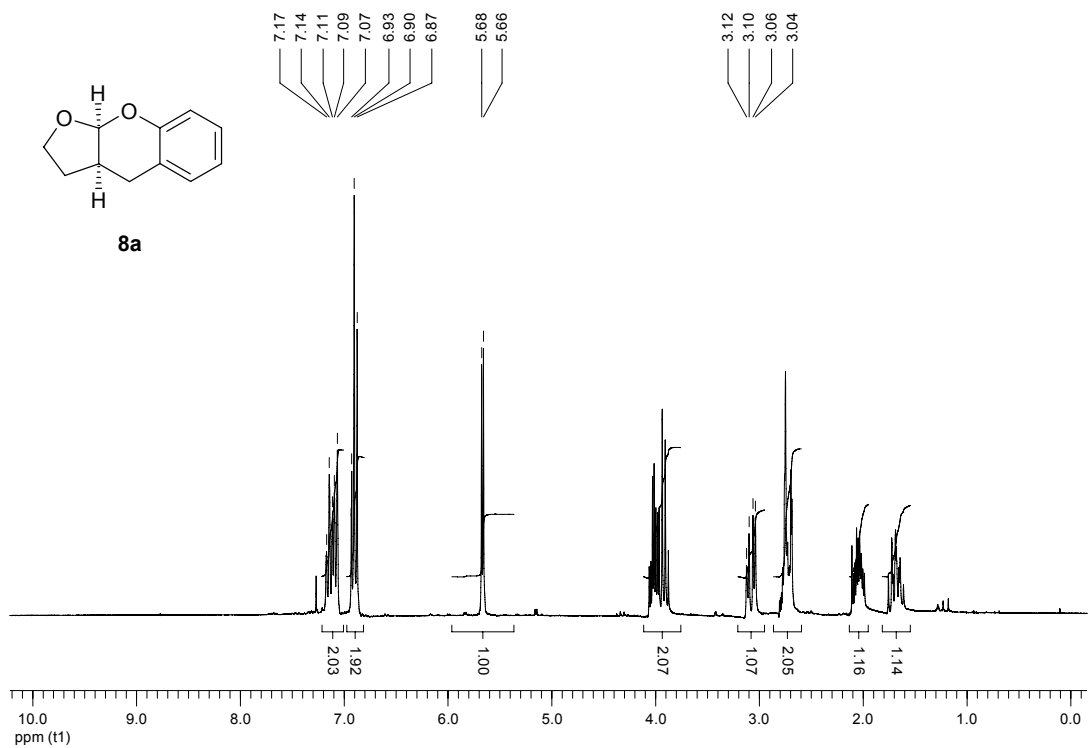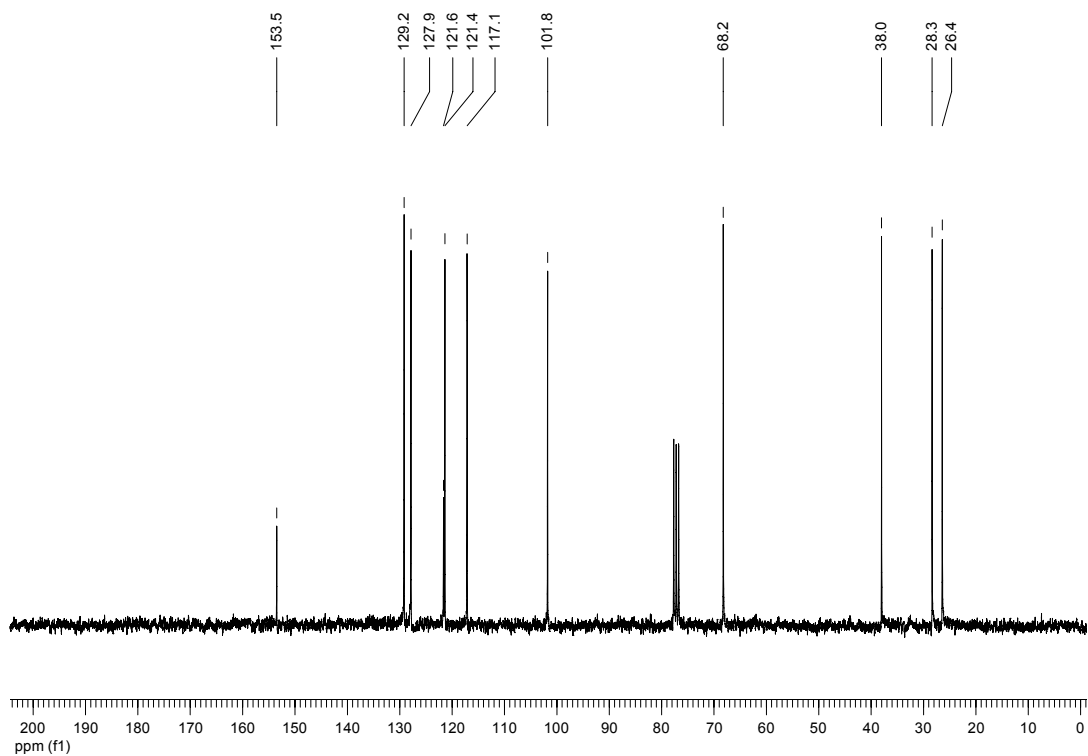

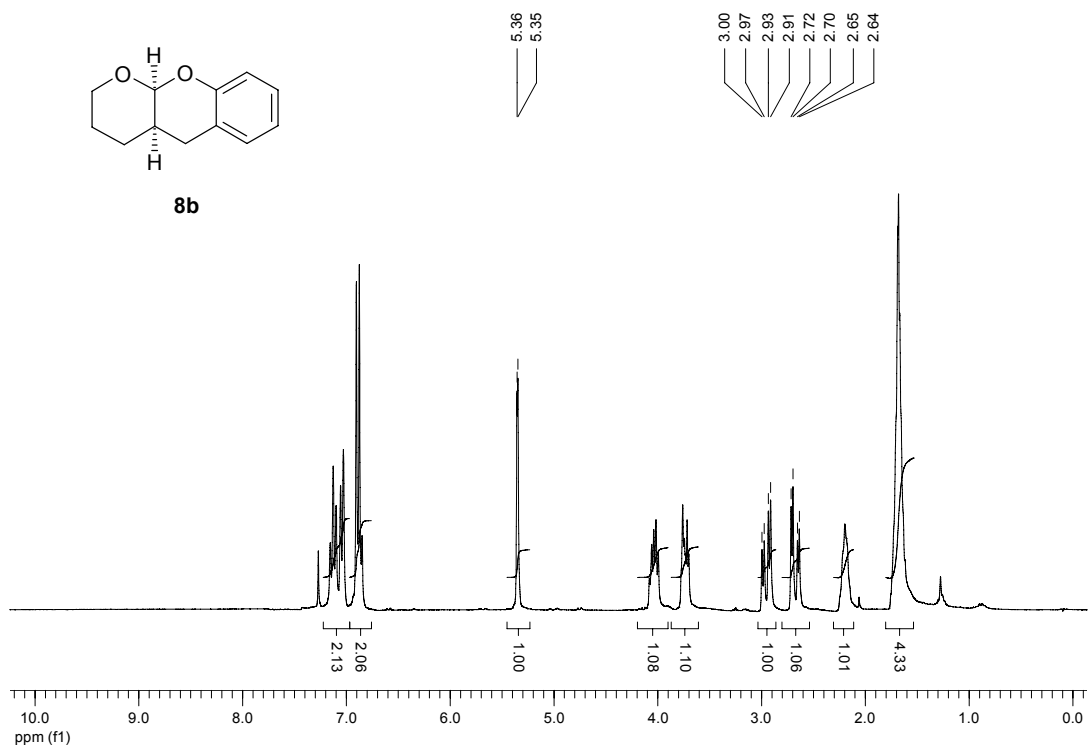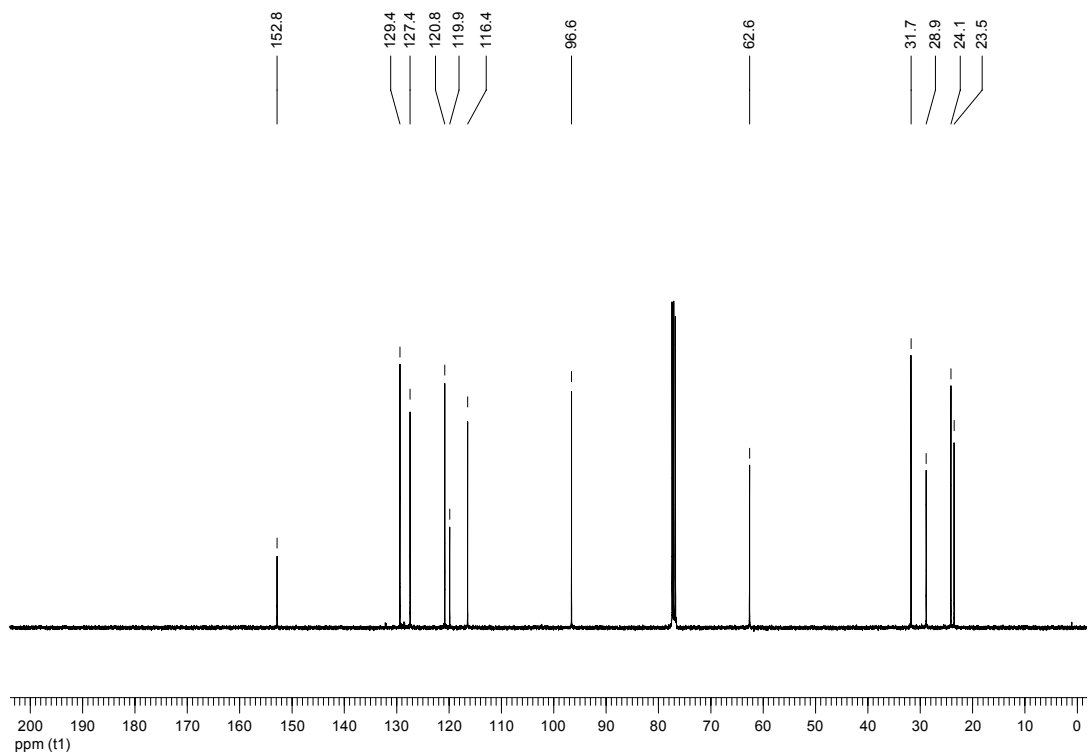

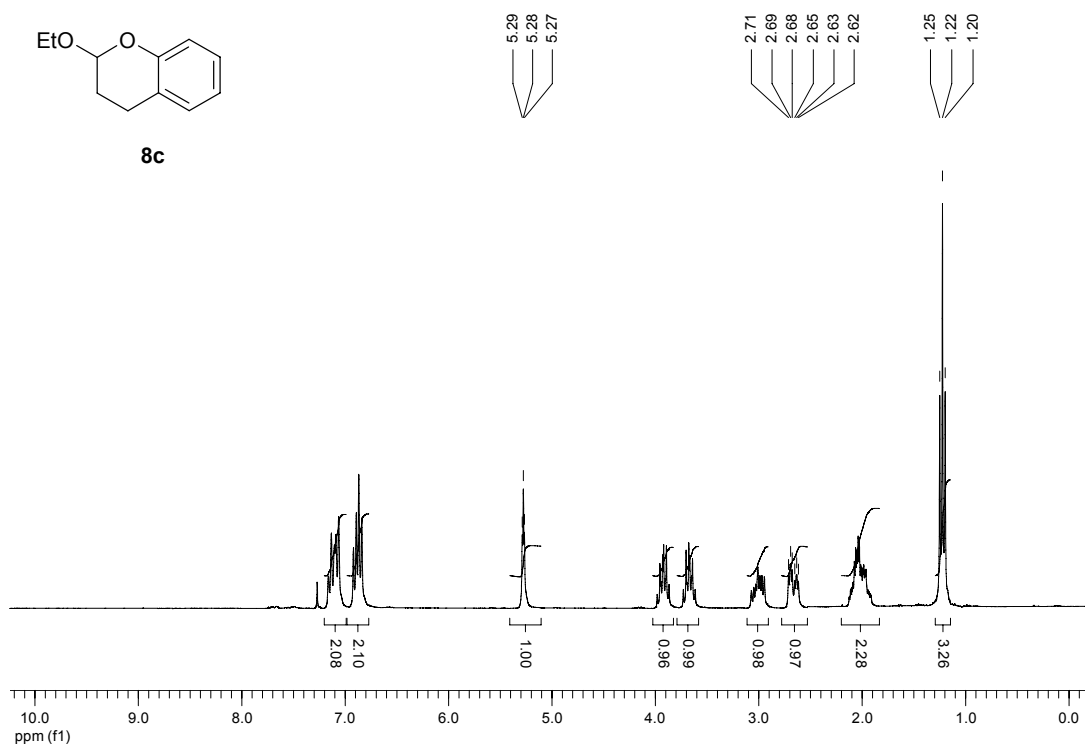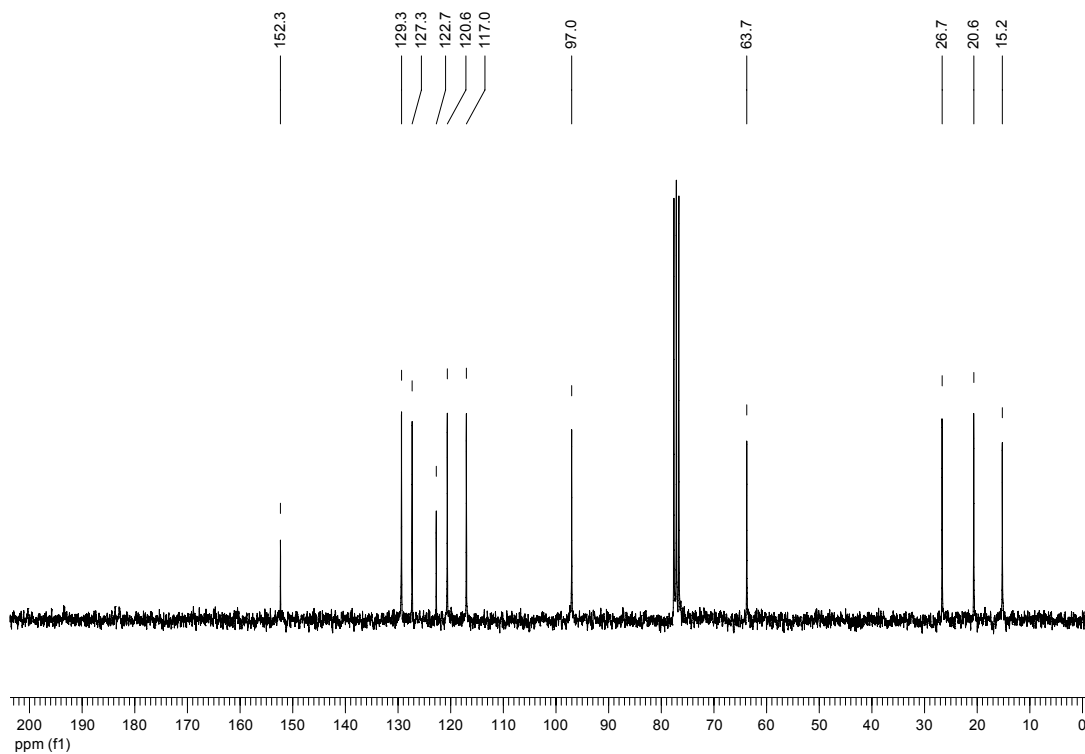

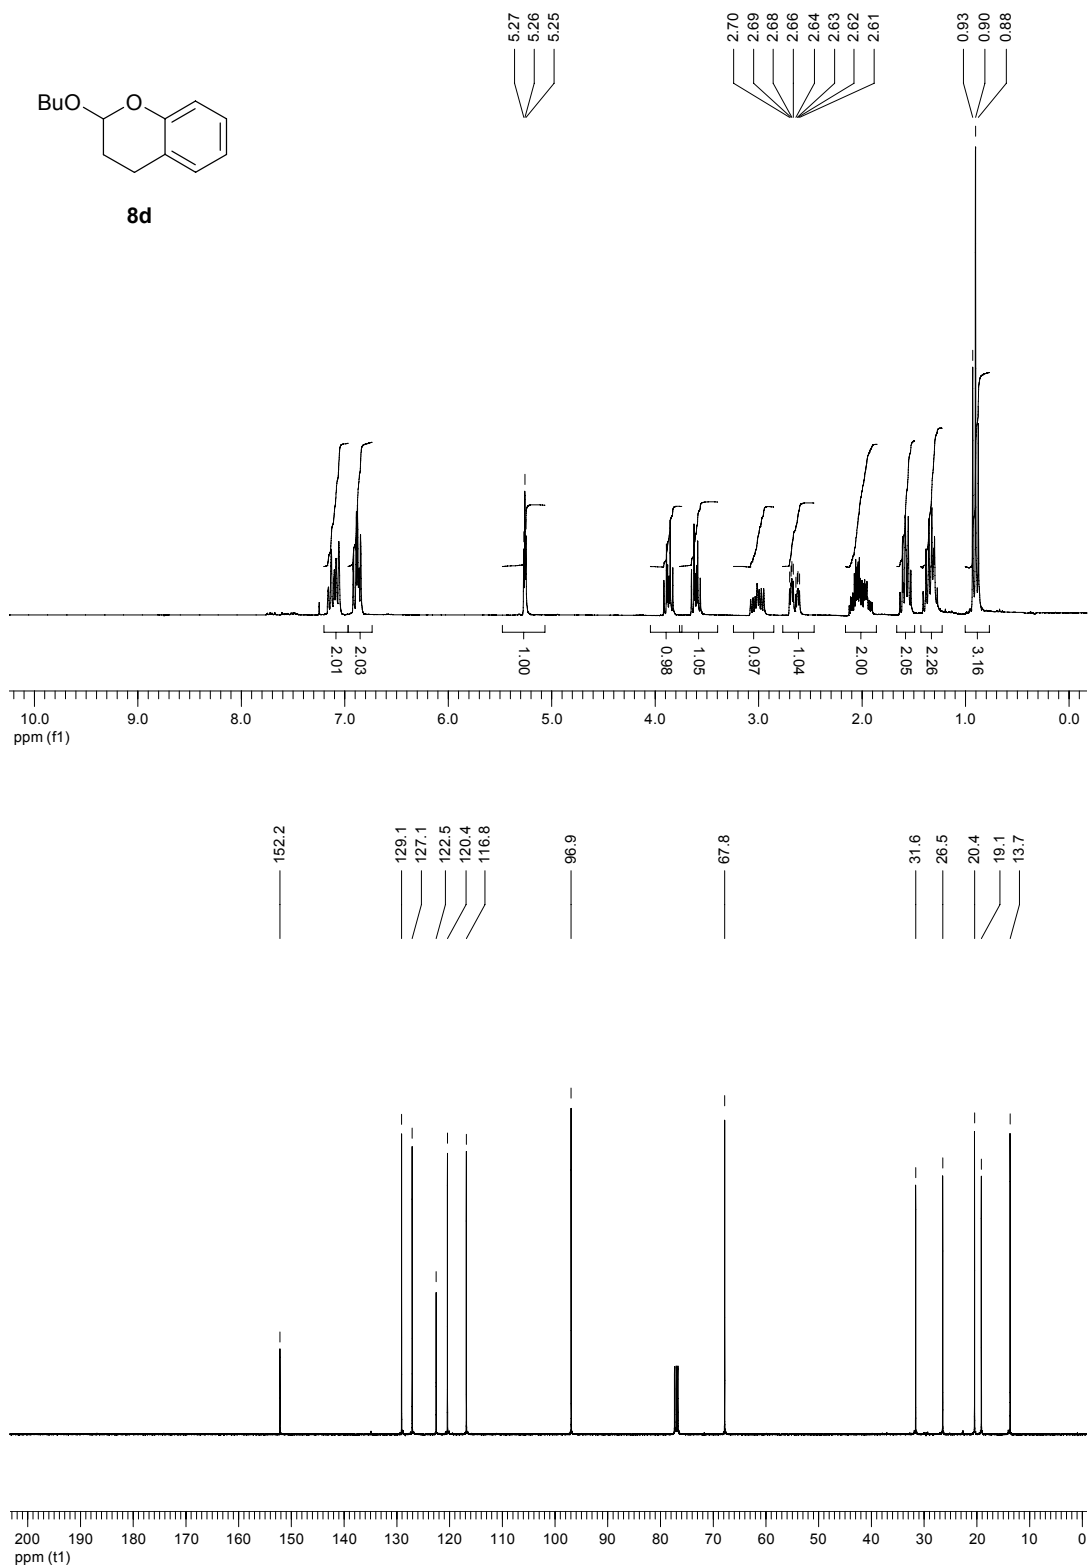

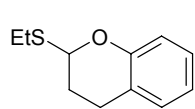

8e

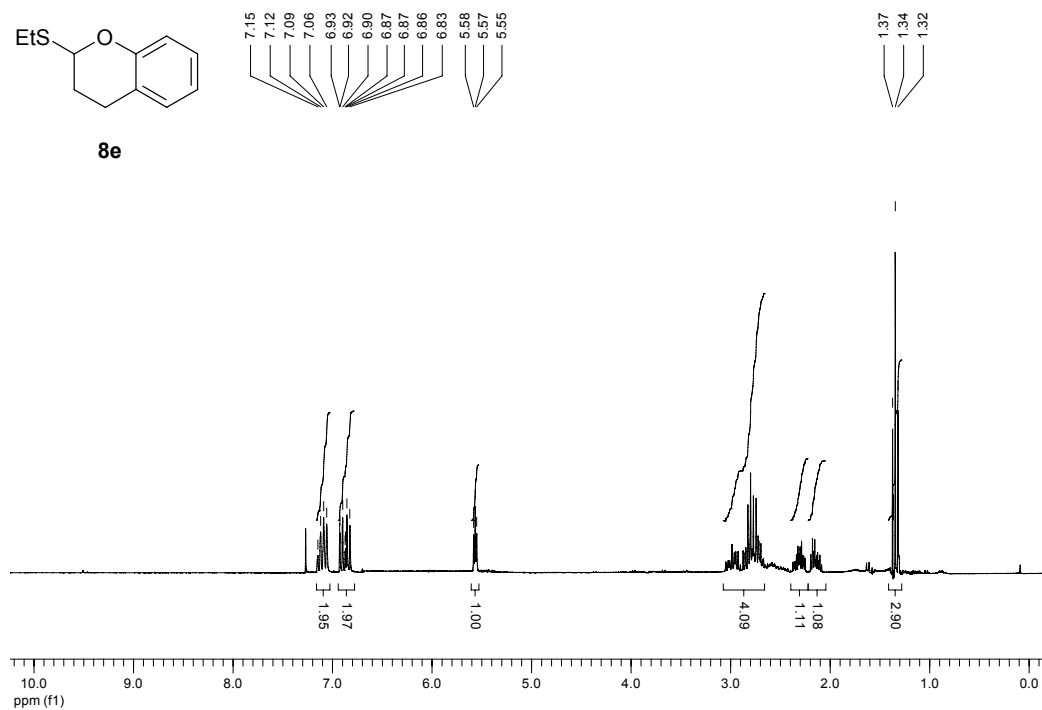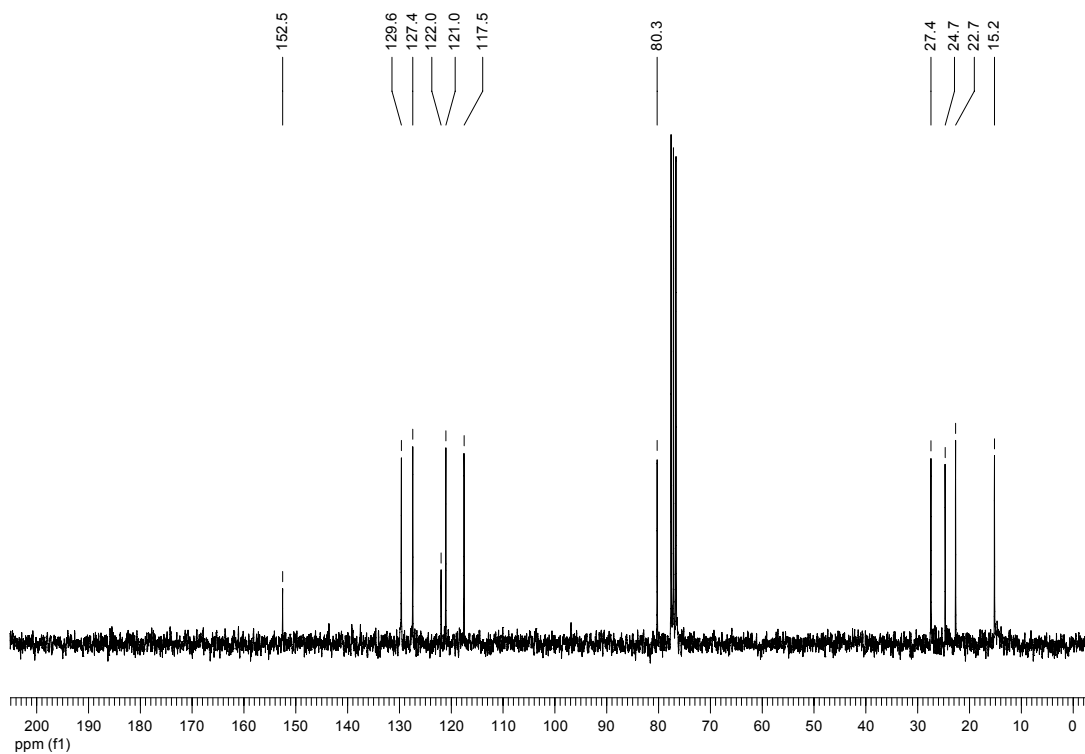

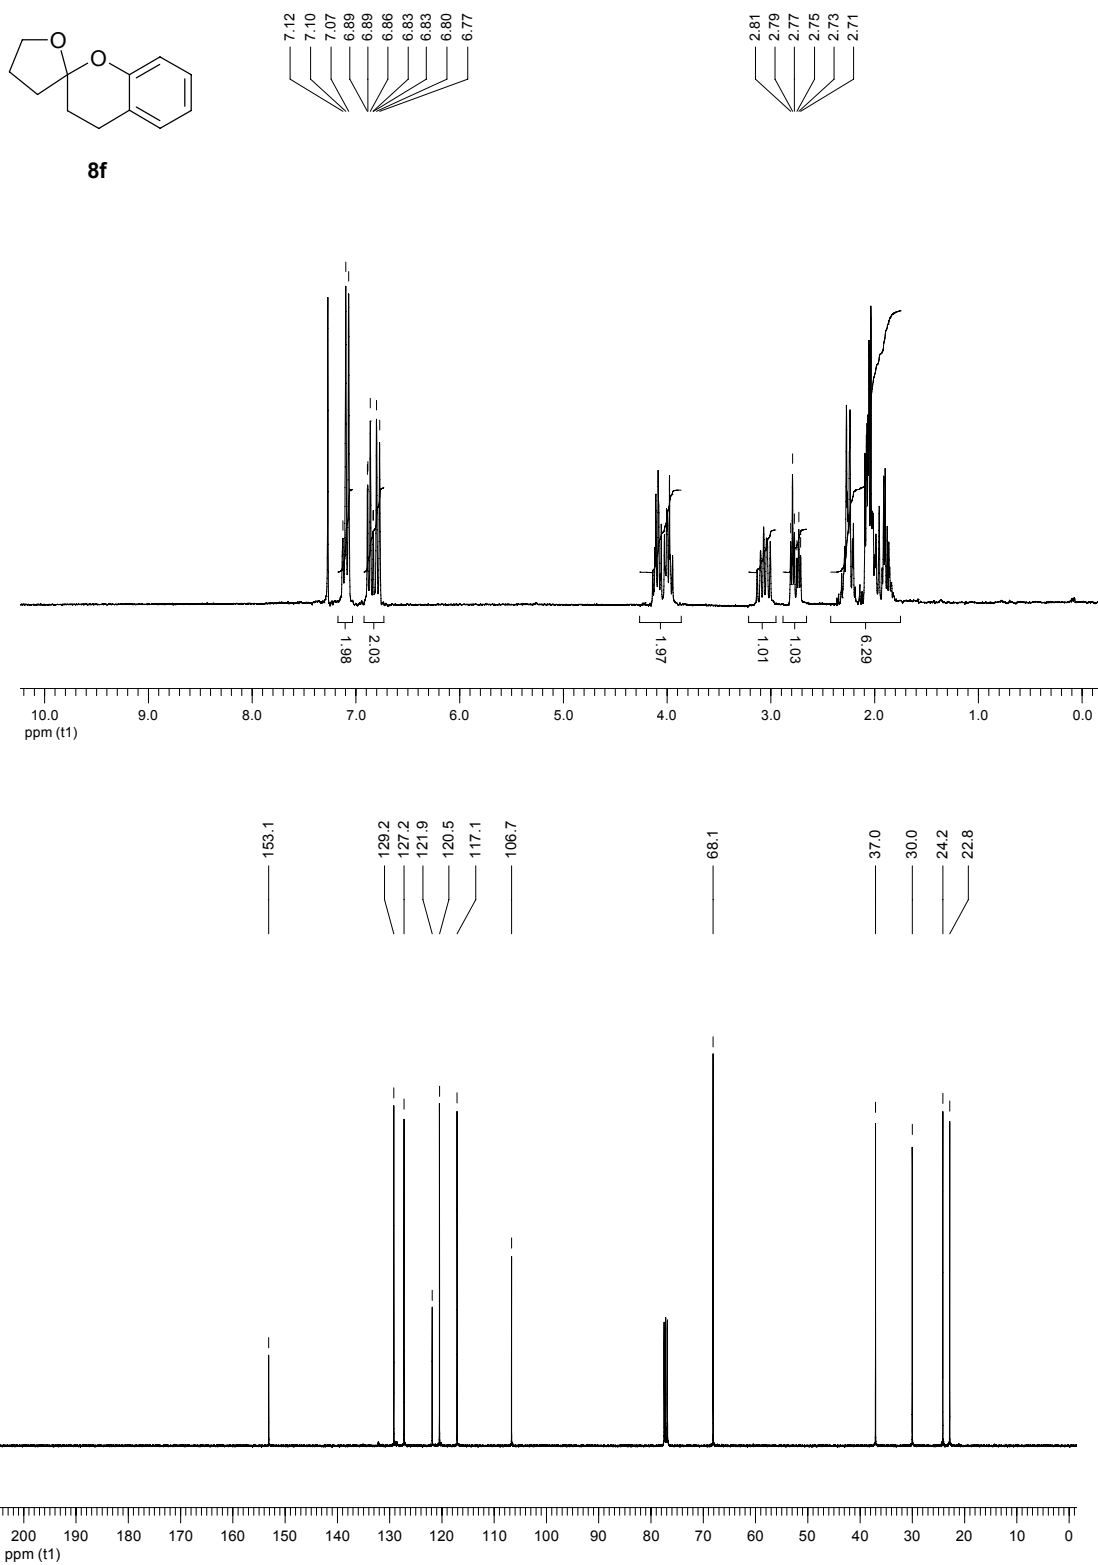

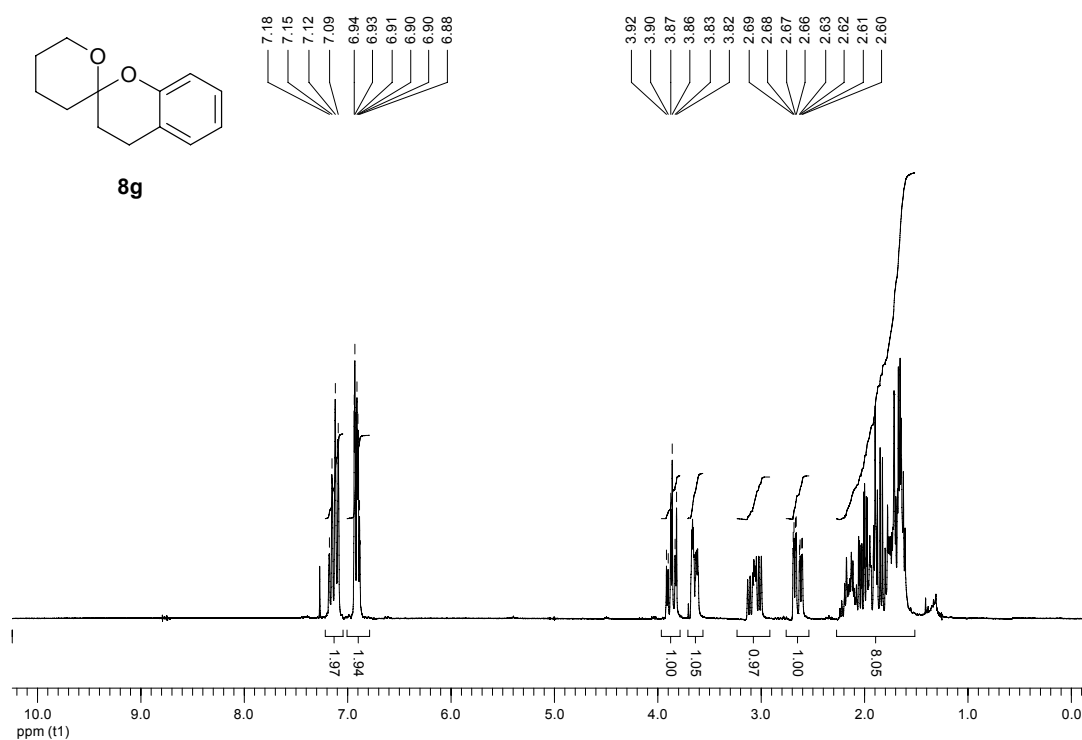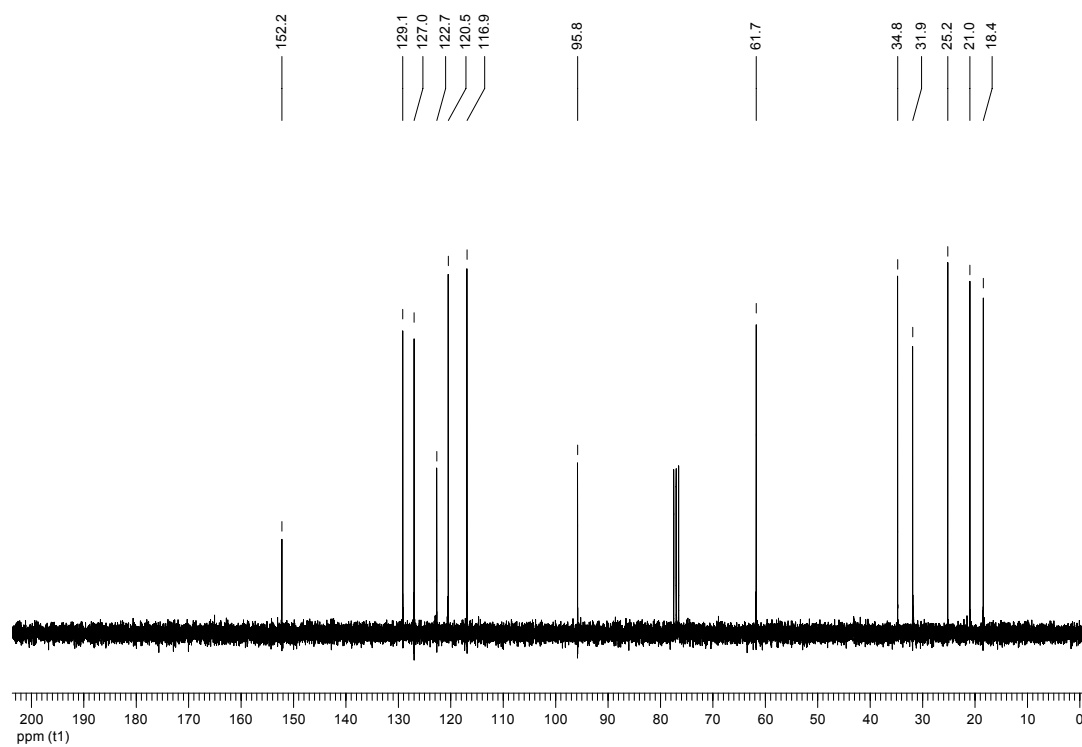

Supplement: b806593d.pdf [file b806593d.pdf]
